# Supplementary material for: Enhanced photocatalytic hydrogen production through modification of B←N coordination units
Source: Royal Society of Chemistry journal article supplement (doi:10.1039/d4nj01729c), 2024-01-01
Supplement: d4nj01729c1.pdf [file d4nj01729c1.pdf]

# Supporting Information

## Enhanced photocatalytic hydrogen production through modification of B←N coordination units

Junyi Gu,<sup>a</sup> Yanan Qiang,<sup>b</sup> Xuemei Mu,<sup>d</sup> Zhihai Liu,<sup>b</sup> Chao Zhang,<sup>b</sup> Min Lai,<sup>\*a</sup>

Xiaobo Pan,<sup>\*c</sup> and Hao Zhao<sup>\*b</sup>

<sup>a</sup> School of Physics and Optoelectronic Engineering, Nanjing University of Information Science and Technology, Nanjing 210044, People's Republic of China.

<sup>b</sup> School of Physics and Electronic Information, Yantai University, Yantai 264005, People's Republic of China.

<sup>c</sup> State Key Laboratory of Applied Organic Chemistry (Lanzhou University), Key Laboratory of Nonferrous Metal Chemistry and Resources Utilization of Gansu Province, College of Chemistry and Chemical Engineering, Lanzhou University, Lanzhou 730000 (P. R. China).

<sup>d</sup> College of Electronic Information Engineering, Shandong University of Science and Technology, Qingdao 266590, China.

## General Methods

All reactions and manipulations were carried out under an argon atmosphere by using standard Schlenk techniques or an inter-atmosphere glovebox. Prior to use  $\text{CH}_2\text{Cl}_2$ ,  $\text{Et}_2\text{O}$ , THF and toluene were dried by refluxing and degassed by applying three freeze-pump-thaw cycles.  $\text{CDCl}_3$  was dried by 4 Å molecular sieve (2-3 days). All chemicals (reagents and solvents) were obtained from commercial suppliers (Energy Chemical, Heowns) and directly used without further purification.

## Synthetic Methods

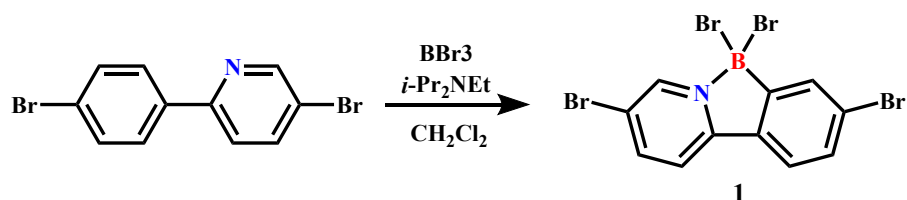

**Compound 1:** To a stirred solution of 5-bromo-2-(4-bromophenyl)pyridine (3.00 g, 9.58 mmol) and  $i\text{-Pr}_2\text{NEt}$  (1.6 mL, 9.20 mmol) in  $\text{CH}_2\text{Cl}_2$  (50 mL) at  $-78\text{ }^\circ\text{C}$ ,  $\text{BBr}_3$  (1.0 M in  $\text{CH}_2\text{Cl}_2$ , 20 mL, 20.00 mmol) was added dropwise. After being stirred at room temperature for 12 h, saturated  $\text{K}_2\text{CO}_3$  aqueous solution was added to the reaction mixture. The formed precipitate was collected via filtration and washed with water and acetone to afford **Compound 1** as a pale-yellow solid (4.20 g, 8.70 mmol, 91%).  $^1\text{H NMR}$  (400MHz,  $\text{CDCl}_3$ , ppm):  $\delta$  9.01 (d,  $J = 1.5$  Hz, 1H), 8.27 (dd,  $J = 8.4$ , 2.1 Hz, 1H), 7.99 (s, 1H), 7.80 (dd,  $J = 8.4$ , 0.6 Hz, 1H), 7.57-7.59 (m, 2H).

**Monomer 1:** To a stirred solution of **Compound 1** (2.41 g, 5.00 mmol) in toluene (50 mL) at room temperature was added  $\text{AlMe}_3$  (1.1 M in hexane, 10 mL, 11.00 mmol). After being stirred at this temperature for 2 h, the reaction was quenched by adding water. The organic layer was separated and extracted with ethyl acetate (twice), washed with water (once), brine (once), and dried over  $\text{MgSO}_4$  and concentrated. The residue was purified by preparative thin layer chromatography on silica gel to afford **Monomer 1** (1.44 g, 4.08 mmol, 82 % yield).  $^1\text{H NMR}$  (400 MHz,  $\text{CDCl}_3$ , ppm):  $\delta$  8.49 (s, 1H), 8.07 (d,  $J = 8.0$  Hz, 1H), 7.79 (d,  $J = 8.0$  Hz, 1H), 7.73

(s, 1H), 7.65 (d,  $J = 8.0$  Hz, 1H), 7.41 (d,  $J = 8.0$  Hz, 1H), 0.03 (s, 6H).  $^{13}\text{C}\{^1\text{H}\}$  NMR (100 MHz,  $\text{CDCl}_3$ , ppm):  $\delta$  155.03, 143.91, 142.49, 132.75, 132.42, 128.69, 128.59, 126.81, 123.16, 118.81, 117.03, 8.90.

**Monomer 2:** Diphenylzinc: Under argon atmosphere, 10 mL of dry tetrahydrofuran was added to a 100 mL flask containing  $\text{ZnBr}_2$  (7.46 g, 33.12 mmol),  $\text{LiCl}$  (1.40 g, 33.12 mmol). Phenylmagnesium bromide 66.24 mL (66.24 mmol, 1.0 M) was added dropwise and the reaction lasted for 3 h. A yellow solution was obtained, and the crude product was directly purified in the next step. Under argon atmosphere, added 40 mL of deoxidized dry dichloromethane to a 100 mL flask containing compound 1 (2.00 g, 4.14 mmol). System temperature was cooled down to  $0^\circ\text{C}$ , the above diphenyl zinc solution was added, and the reaction lasted for 12 h. After the reaction was completed, the reaction was quenched by adding 100 mL of water and extracted with ethyl acetate ( $3 \times 100$  mL), with the organic phases combined. The product was dried over anhydrous magnesium sulfate and evaporated to obtain the crude product. The crude product was separated by silica gel chromatography ( $V_{\text{PE}}: V_{\text{DCM}} = 4:1$ ) and dried in a vacuum oven at  $60^\circ\text{C}$  to obtain 1.01 g of white solid product (51% yield).  $^1\text{H}$  NMR (400 MHz,  $\text{CDCl}_3$ ):  $\delta$  8.55 (d,  $J = 1.5$  Hz, 1H), 8.16 (dd,  $J = 8.6, 2.0$  Hz, 1H), 7.90 (dd,  $J = 8.6, 0.4$  Hz, 1H), 7.81 (d,  $J = 1.7$  Hz, 1H), 7.70 (d,  $J = 8.2$  Hz, 1H), 7.47 (dd,  $J = 8.2, 1.9$  Hz, 1H), 7.25-7.16 (m, 10H),  $^{13}\text{C}$  NMR (101 MHz,  $\text{CDCl}_3$ ):  $\delta$  156.31, 145.36, 143.67, 133.86, 133.72, 133.03, 129.54, 127.69, 127.53, 126.23, 123.20, 118.99, 117.44.

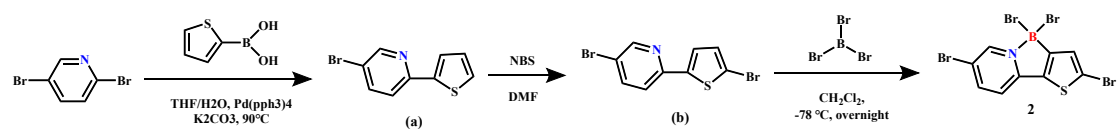

**Compound (a):** Under argon atmosphere, added a deoxygenated solvent mixture (100 mL of tetrahydrofuran, 50 mL of distilled water) to a 250 mL flask containing 5-dibromopyridine (5.00 g, 21.11 mmol), 2-thiopheneboronic acid (2.70 g, 21.11 mmol), potassium carbonate (8.75 g, 63.33 mmol), and tetrakis(triphenylphosphine-palladium)

(0.62 g, 0.53 mmol). Heated to 90 °C and maintained for 24 h. After the reaction was completed, 100 mL of water was added to quench the reaction and extracted with ethyl acetate (3 × 100 mL), with the organic phases combined. Dried over anhydrous magnesium sulfate and evaporated to obtain the crude product. The crude product was separated by silica gel chromatography ( $V_{PE}: V_{DCM} = 1:1$ ) and dried in a vacuum oven at 60 °C to obtain 3.29 g of white solid product (65% yield).

**Compound (b):** Under argon atmosphere, added 20 mL of dimethylformamide to a 100 mL flask containing compound (a) (3.00 g, 12.49 mmol). Reduce the system temperature to 0 °C, add N-bromosuccinimide (3.56 g, 20.01 mmol), and the reaction lasted for 12 h. After the reaction was completed, 100 mL of water was added to quench the reaction and extracted with ethyl acetate (3 × 100 mL), with the organic phases combined. Dried over anhydrous magnesium sulfate and evaporated to obtain the crude product. The crude product was separated by silica gel chromatography ( $V_{PE}: V_{DCM} = 1:1$ ) and dried in a vacuum oven at 60 °C to obtain 3.59 g of white solid product (90% yield). <sup>1</sup>H NMR (400 MHz, CDCl<sub>3</sub>): δ 8.56 (s, 1H), 7.76 (dd,  $J = 8.4, 2.4$  Hz, 1H), 7.45 (d,  $J = 8.8$  Hz, 1H), 7.28 (d,  $J = 3.6$  Hz, 1H), 7.04 (d,  $J = 3.6$  Hz, 1H).

**Compound 2:** Under argon atmosphere, added Compound (b) (2.01 g, 6.30 mmol), 1 mL diisopropylethylamine, and 40 mL of deoxygenated dry dichloromethane solvent to a 100 mL flask. After the reaction system was cooled down to 78 °C, 8 mL of boron tribromide (1.0 mol/L) was added, and the solution changed from white to yellow. After that, restored the system temperature to room

temperature gradually and reacted overnight. The next day, 50 mL of water was added to quench, the resulting precipitate was washed with 300 mL of acetone, and then dried in a vacuum oven at 60 °C to obtain a solid product of 2.71 g (88% yield).

**Monomer 3:** Under argon atmosphere, added 40 mL of deoxidized dry dichloromethane to a 100 mL flask containing compound 2 (2.00 g, 4.09 mmol). Reduce the temperature of the system to 0 °C, add the above diphenyl zinc solution, and the reaction lasted for 12 h. After the reaction was completed, 100 mL of water was added to quench the reaction and extracted with ethyl acetate (3 × 100 mL), with the organic phases combined. Dried over anhydrous magnesium sulfate and evaporated to obtain the crude product. The crude product was separated by silica gel chromatography ( $V_{PE}: V_{DCM} = 1:1$ ) and dried in a vacuum oven at 60 °C to obtain 1.05 g of white solid product (53% yield).

### **Electrochemical impedance test method**

Electrochemical impedance spectra were recorded using a CHI-760E electrochemical workstation in a standard three electrode configuration. The polymer (4.0 mg) was dispersed in ethanol (0.5 mL) containing 1 % nafion by ultrasound for 1 hour. The work electrodes were prepared via drop-casting the mixture 20  $\mu$ L onto the surface of FTO glass substrate electrode with 1 cm<sup>2</sup> illuminated area and then being filmed at 80 °C in vacuum oven. The Pt plate served as the counter electrode, and a saturated Ag/AgCl electrode as a reference electrode. A 0.5 M Na<sub>2</sub>SO<sub>4</sub> solution was used as the electrolyte. A 300 W Xenon lamp equipped with a 420 nm cut-off filter (100 mW cm<sup>-1</sup>) was used as the light source in the photocurrent response

measurement. The electrochemical impedance spectroscopy (EIS) measurements were performed over a frequency range from 0.01 to 100000 Hz with a 50 mV amplitude.

## Characterization of polymers

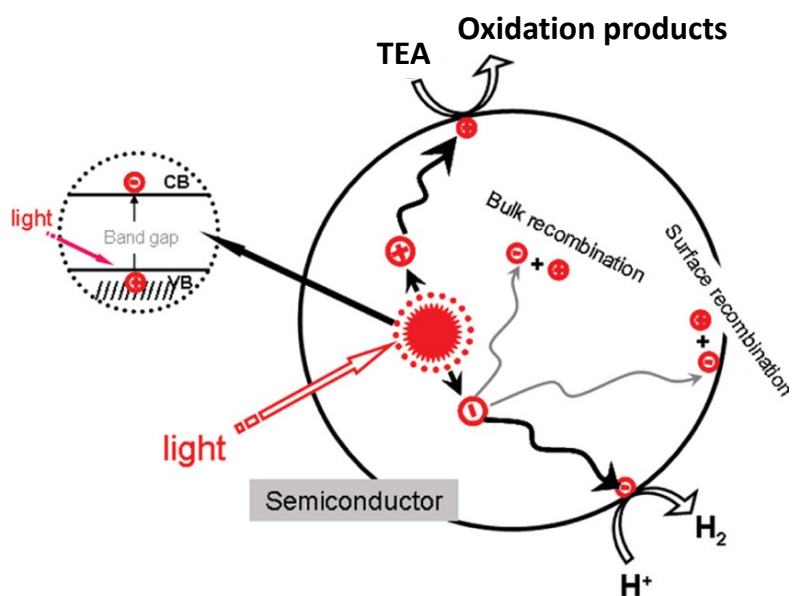

**Figure S1.** Processes in photocatalytic water splitting.

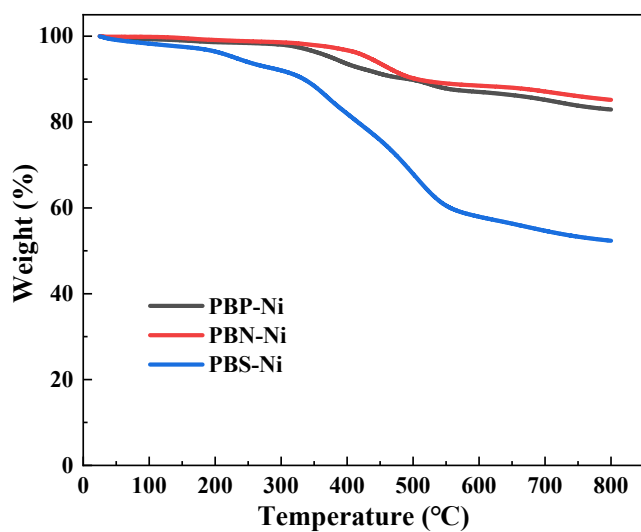

Figure S2. TGA analysis under nitrogen atmosphere.

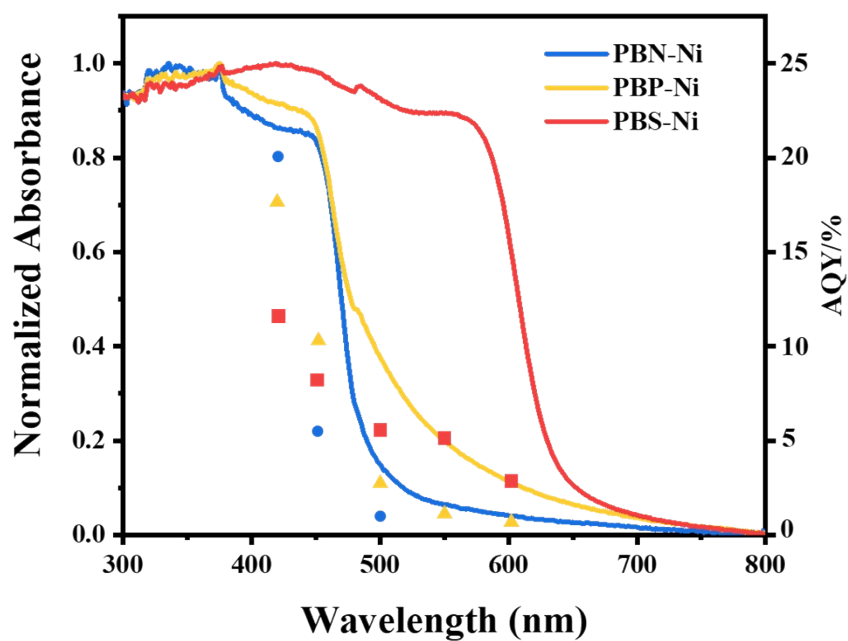

Figure S3. Wavelength-dependent AQYs of polymers superimposed on their absorption curves.



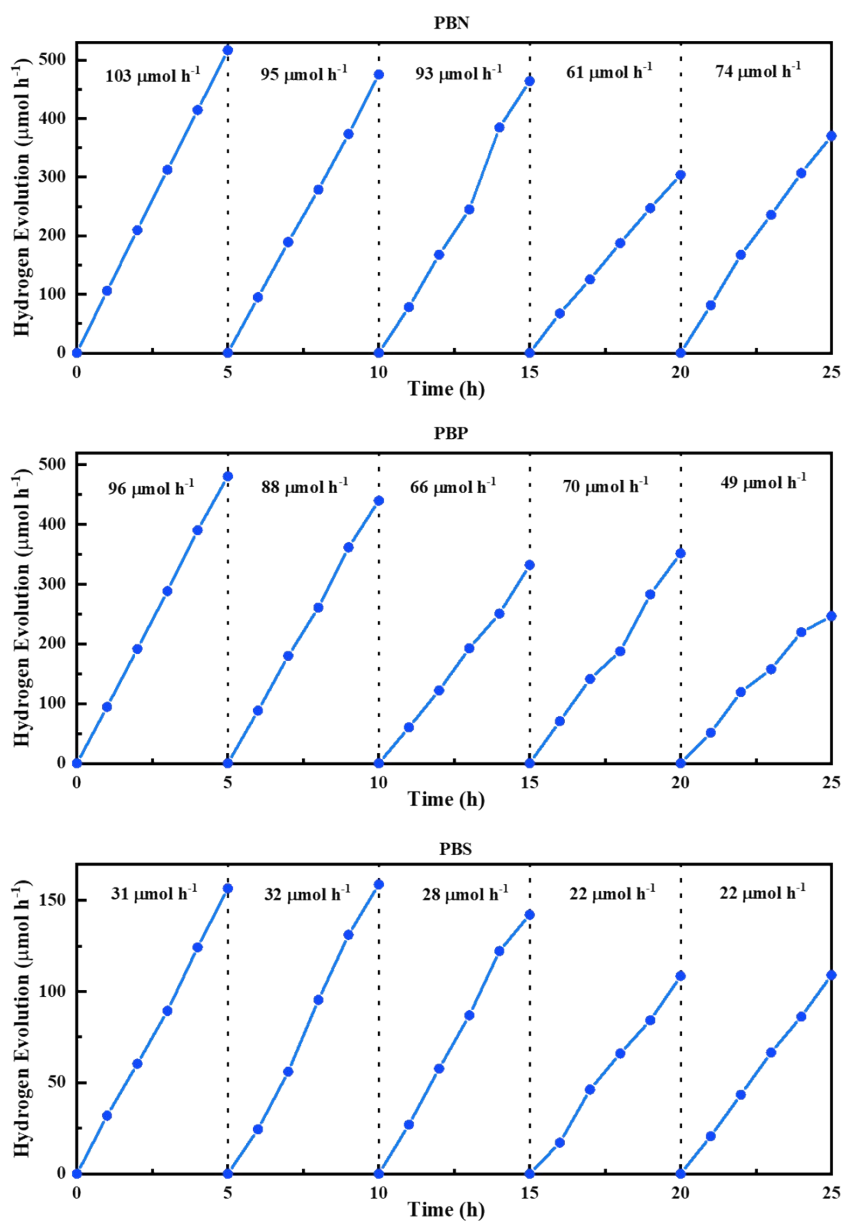

**Figure S4.** Photostability and reusability using polymers as a photocatalysts under visible-light illumination ( $\lambda > 420 \text{ nm}$ ).

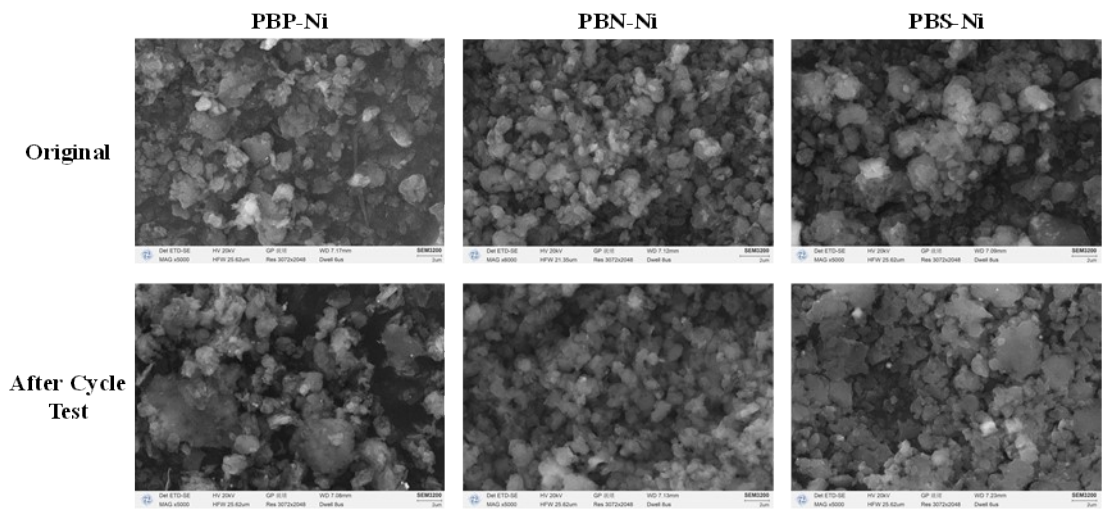

**Figure S5.** SEM images of polymers before and after cycle test.

### Cartesian coordinates for the optimized geometries

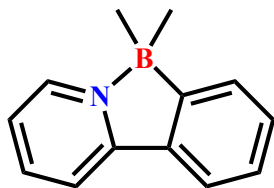

MBN1-DFT

Coordinates from Gaussian 09-B3LYP/6-311G (d, p)

|   |          |          |          |
|---|----------|----------|----------|
| C | 0.79095  | -0.81191 | 0.00003  |
| C | -0.66559 | -0.87106 | 0.00003  |
| N | -1.1929  | 0.3825   | -0.00037 |
| B | -0.0255  | 1.54732  | 0.00011  |
| C | 1.22509  | 0.53048  | 0.00014  |
| C | 2.603    | 0.76113  | 0.0002   |
| C | 3.50008  | -0.30542 | 0.0001   |
| C | 3.04369  | -1.62945 | -0.00012 |
| C | 1.68051  | -1.89261 | -0.00024 |
| C | -1.5135  | -1.98398 | 0.00022  |
| C | -2.88546 | -1.789   | 0.0003   |
| C | -3.40288 | -0.49017 | -0.00025 |
| C | -2.51744 | 0.57337  | -0.00053 |
| C | -0.17658 | 2.42562  | -1.36126 |
| C | -0.17753 | 2.42522  | 1.36162  |
| H | 2.98423  | 1.77773  | 0.00038  |

|   |          |          |          |
|---|----------|----------|----------|
| H | 4.56799  | -0.11238 | 0.00019  |
| H | 3.75511  | -2.44742 | -0.00023 |
| H | 1.32465  | -2.91795 | -0.00046 |
| H | -1.09217 | -2.98064 | 0.00026  |
| H | -3.55527 | -2.64125 | 0.00043  |
| H | -2.84829 | 1.60424  | -0.00084 |
| H | -1.10517 | 3.01099  | -1.38226 |
| H | 0.64514  | 3.14776  | -1.42991 |
| H | -0.14582 | 1.82058  | -2.27473 |
| H | -1.10607 | 3.0107   | 1.38199  |
| H | 0.6442   | 3.14724  | 1.4312   |
| H | -0.14763 | 1.81991  | 2.27494  |
| H | -4.4691  | -0.30688 | -0.00041 |

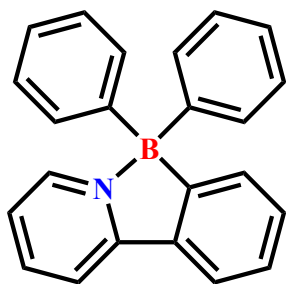

MBP1-DFT

|   |         |          |          |
|---|---------|----------|----------|
| C | 2.2095  | 0.00061  | -0.56735 |
| C | 2.03625 | -0.24189 | 0.8602   |
| N | 0.7168  | -0.24512 | 1.18737  |
| B | -0.2488 | 0.01618  | -0.12375 |
| C | 0.95579 | 0.13785  | -1.19632 |
| C | 0.9438  | 0.37667  | -2.57155 |
| C | 2.13946 | 0.46845  | -3.28213 |
| C | 3.37356 | 0.32941  | -2.63559 |
| C | 3.41723 | 0.09477  | -1.26776 |
| C | 2.99988 | -0.4626  | 1.84907  |
| C | 2.58998 | -0.68498 | 3.15419  |
| C | 1.22698 | -0.68761 | 3.4641   |
| C | 0.31662 | -0.46494 | 2.44623  |
| H | 0.0005  | 0.49514  | -3.09451 |
| H | 2.11777 | 0.65331  | -4.35105 |
| H | 4.29388 | 0.40701  | -3.203   |
| H | 4.37241 | -0.01035 | -0.76369 |

|   |          |          |          |
|---|----------|----------|----------|
| H | 4.04948  | -0.46055 | 1.58642  |
| H | 3.32487  | -0.85901 | 3.93175  |
| H | -0.75275 | -0.46076 | 2.61168  |
| H | 0.87693  | -0.86204 | 4.47257  |
| C | -1.20505 | -1.29161 | -0.27884 |
| C | -2.44966 | -1.37581 | 0.37005  |
| C | -0.80353 | -2.41855 | -1.01558 |
| C | -3.2456  | -2.51855 | 0.29618  |
| H | -2.81706 | -0.5205  | 0.92885  |
| C | -1.59326 | -3.56435 | -1.10117 |
| H | 0.14545  | -2.39873 | -1.5416  |
| C | -2.81915 | -3.62025 | -0.44193 |
| H | -4.20249 | -2.54517 | 0.80776  |
| H | -1.25239 | -4.41315 | -1.68545 |
| H | -3.43772 | -4.50894 | -0.50818 |
| C | -1.03357 | 1.4297   | 0.05362  |
| C | -2.13909 | 1.71892  | -0.76614 |
| C | -0.61926 | 2.44769  | 0.9274   |
| C | -2.79433 | 2.94756  | -0.71528 |
| H | -2.50139 | 0.96164  | -1.45391 |
| C | -1.27231 | 3.67857  | 0.99239  |
| H | 0.23873  | 2.29049  | 1.57422  |

|   |          |         |          |
|---|----------|---------|----------|
| C | -2.3652  | 3.93508 | 0.16935  |
| H | -3.64466 | 3.13235 | -1.36391 |
| H | -0.9236  | 4.43859 | 1.68443  |
| H | -2.87587 | 4.89086 | 0.21596  |

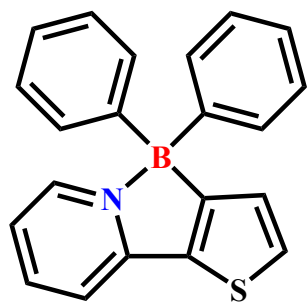

MBS1-DFT

|   |          |          |          |
|---|----------|----------|----------|
| C | -1.06394 | 0.34922  | -2.61023 |
| C | -0.8806  | 0.13311  | -1.21633 |
| C | -2.09623 | 0.0277   | -0.57209 |
| S | -3.46784 | 0.1852   | -1.63305 |
| C | -2.38284 | 0.39697  | -2.97712 |
| C | -1.97778 | -0.18078 | 0.844    |
| N | -0.65326 | -0.19865 | 1.17944  |
| C | -0.27005 | -0.39634 | 2.44558  |
| C | -1.19247 | -0.57603 | 3.46223  |
| C | -2.5537  | -0.555   | 3.14156  |
| C | -2.95476 | -0.35856 | 1.83008  |
| B | 0.32563  | 0.01476  | -0.14485 |
| C | 1.13509  | 1.41668  | -0.00516 |
| C | 1.24787  | -1.31734 | -0.26986 |
| C | 0.75141  | 2.45958  | 0.85252  |
| C | 1.43067  | 3.67757  | 0.88465  |



|   |          |          |          |
|---|----------|----------|----------|
| C | 2.51887  | 3.89436  | 0.04415  |
| C | 2.91708  | 2.88082  | -0.82545 |
| C | 2.23579  | 1.66566  | -0.84424 |
| C | 2.49562  | -1.41218 | 0.37072  |
| C | 3.26324  | -2.57542 | 0.3218   |
| C | 2.80368  | -3.68655 | -0.38151 |
| C | 1.57347  | -3.61993 | -1.0318  |
| C | 0.81207  | -2.45372 | -0.97174 |
| H | -0.25809 | 0.46882  | -3.32272 |
| H | -2.79789 | 0.54732  | -3.96289 |
| H | 0.79809  | -0.40872 | 2.62019  |
| H | -0.85342 | -0.73165 | 4.47728  |
| H | -3.29647 | -0.69518 | 3.91848  |
| H | -4.00211 | -0.34319 | 1.55767  |
| H | -0.10175 | 2.33218  | 1.51182  |
| H | 1.10614  | 4.45841  | 1.56506  |
| H | 3.04979  | 4.83993  | 0.06567  |
| H | 3.7632   | 3.035    | -1.4874  |
| H | 2.57234  | 0.88768  | -1.52205 |
| H | 2.887    | -0.55071 | 0.90301  |
| H | 4.22362  | -2.61122 | 0.82616  |
| H | 3.4001   | -4.59147 | -0.42774 |

H 1.20717 -4.47645 -1.5887

H -0.14251 -2.42606 -1.48758

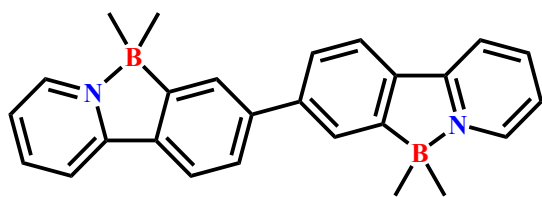

MBN2-DFT

1(C) --> Charge: 6.000000 x,y,z(Bohr): -9.371301 -1.470464 -0.412779  
 2(C) --> Charge: 6.000000 x,y,z(Bohr): -6.623442 -1.425035 -0.582712  
 3(N) --> Charge: 7.000000 x,y,z(Bohr): -5.712662 0.870542 0.120856  
 4(B) --> Charge: 5.000000 x,y,z(Bohr): -7.993333 2.833552 0.941433  
 5(C) --> Charge: 6.000000 x,y,z(Bohr): -10.282300 0.887120 0.438122  
 6(C) --> Charge: 6.000000 x,y,z(Bohr): -12.894575 1.156567 0.705054  
 7(C) --> Charge: 6.000000 x,y,z(Bohr): -14.512496 -0.845149 0.144138  
 8(C) --> Charge: 6.000000 x,y,z(Bohr): -13.561139 -3.166786 -0.697060  
 9(C) --> Charge: 6.000000 x,y,z(Bohr): -10.973586 -3.496231 -0.982090  
 10(C) --> Charge: 6.000000 x,y,z(Bohr): -4.936723 -3.317976 -1.326309  
 11(C) --> Charge: 6.000000 x,y,z(Bohr): -2.371166 -2.817805 -1.344139  
 12(C) --> Charge: 6.000000 x,y,z(Bohr): -1.444390 -0.431669 -0.620083  
 13(C) --> Charge: 6.000000 x,y,z(Bohr): -3.235756 1.356246 0.110516  
 14(C) --> Charge: 6.000000 x,y,z(Bohr): -7.602104 3.595585 3.893910  
 15(C) --> Charge: 6.000000 x,y,z(Bohr): -7.928024 5.243682 -0.967705  
 16(C) --> Charge: 6.000000 x,y,z(Bohr): 6.414601 1.317219 -0.612931  
 17(C) --> Charge: 6.000000 x,y,z(Bohr): 9.155435 1.546766 -0.469660  
 18(N) --> Charge: 7.000000 x,y,z(Bohr): 10.195033 -0.652615 0.358063  
 19(B) --> Charge: 5.000000 x,y,z(Bohr): 8.044195 -2.835677 0.919494

20(C) --> Charge: 6.000000 x,y,z(Bohr): 5.647386 -1.119510 0.144942  
21(C) --> Charge: 6.000000 x,y,z(Bohr): 3.068270 -1.649376 0.129896  
22(C) --> Charge: 6.000000 x,y,z(Bohr): 1.288258 0.168727 -0.617198  
23(C) --> Charge: 6.000000 x,y,z(Bohr): 2.131495 2.580791 -1.368761  
24(C) --> Charge: 6.000000 x,y,z(Bohr): 4.684014 3.166249 -1.366886  
25(C) --> Charge: 6.000000 x,y,z(Bohr): 10.705687 3.609984 -1.038623  
26(C) --> Charge: 6.000000 x,y,z(Bohr): 13.297981 3.376881 -0.745925  
27(C) --> Charge: 6.000000 x,y,z(Bohr): 14.322493 1.097298 0.109932  
28(C) --> Charge: 6.000000 x,y,z(Bohr): 12.697453 -0.881425 0.644125  
29(C) --> Charge: 6.000000 x,y,z(Bohr): 8.163058 -3.576417 3.899608  
30(C) --> Charge: 6.000000 x,y,z(Bohr): 8.555905 -5.210392 -0.964819  
31(H) --> Charge: 1.000000 x,y,z(Bohr): -13.683595 2.935626 1.355155  
32(H) --> Charge: 1.000000 x,y,z(Bohr): -16.538364 -0.610162 0.359759  
33(H) --> Charge: 1.000000 x,y,z(Bohr): -14.845524 -4.704451 -1.124710  
34(H) --> Charge: 1.000000 x,y,z(Bohr): -10.231281 -5.293786 -1.633438  
35(H) --> Charge: 1.000000 x,y,z(Bohr): -5.648852 -5.147346 -1.900002  
36(H) --> Charge: 1.000000 x,y,z(Bohr): -1.056670 -4.262908 -1.958396  
37(H) --> Charge: 1.000000 x,y,z(Bohr): -2.694866 3.224392 0.745078  
38(H) --> Charge: 1.000000 x,y,z(Bohr): -5.886195 4.721125 4.199605  
39(H) --> Charge: 1.000000 x,y,z(Bohr): -9.188919 4.762829 4.534528  
40(H) --> Charge: 1.000000 x,y,z(Bohr): -7.508748 1.958969 5.159893  
41(H) --> Charge: 1.000000 x,y,z(Bohr): -6.219896 6.396722 -0.726457

42(H) --> Charge: 1.000000 x,y,z(Bohr): -9.534143 6.491926 -0.577317  
43(H) --> Charge: 1.000000 x,y,z(Bohr): -8.049197 4.713033 -2.966353  
44(H) --> Charge: 1.000000 x,y,z(Bohr): 2.410378 -3.488076 0.758589  
45(H) --> Charge: 1.000000 x,y,z(Bohr): 0.775265 3.976664 -2.005875  
46(H) --> Charge: 1.000000 x,y,z(Bohr): 5.298417 5.028832 -1.964387  
47(H) --> Charge: 1.000000 x,y,z(Bohr): 9.872912 5.357850 -1.696701  
48(H) --> Charge: 1.000000 x,y,z(Bohr): 14.526182 4.957916 -1.178193  
49(H) --> Charge: 1.000000 x,y,z(Bohr): 16.337596 0.860148 0.358458  
50(H) --> Charge: 1.000000 x,y,z(Bohr): 13.361891 -2.696358 1.315170  
51(H) --> Charge: 1.000000 x,y,z(Bohr): 7.939341 -1.950435 5.162740  
52(H) --> Charge: 1.000000 x,y,z(Bohr): 6.641232 -4.905419 4.355417  
53(H) --> Charge: 1.000000 x,y,z(Bohr): 9.936545 -4.524609 4.408122  
54(H) --> Charge: 1.000000 x,y,z(Bohr): 8.605179 -4.679096 -2.966352  
55(H) --> Charge: 1.000000 x,y,z(Bohr): 7.048398 -6.615078 -0.751396  
56(H) --> Charge: 1.000000 x,y,z(Bohr): 10.331797 -6.192462 -0.535364

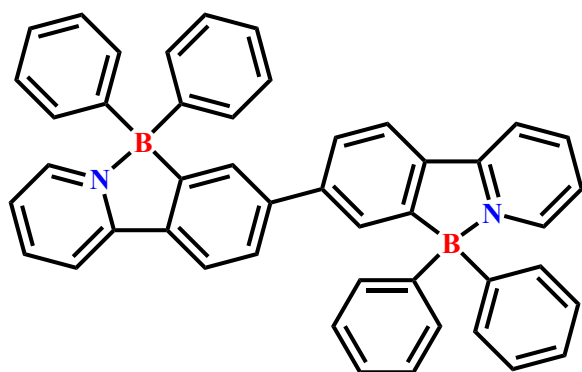

MBP2-DFT

1(C) --> Charge: 6.000000 x,y,z(Bohr): 8.647089 4.472654 -0.219411

2(C) --> Charge: 6.000000 x,y,z(Bohr): 6.049071 3.628547 -0.571840

3(N) --> Charge: 7.000000 x,y,z(Bohr): 5.889068 1.075258 -0.357328

4(B) --> Charge: 5.000000 x,y,z(Bohr): 8.657808 -0.224310 0.246393

5(C) --> Charge: 6.000000 x,y,z(Bohr): 10.235398 2.393693 0.282726

6(C) --> Charge: 6.000000 x,y,z(Bohr): 12.799902 2.876501 0.663570

7(C) --> Charge: 6.000000 x,y,z(Bohr): 13.723749 5.341535 0.555858

8(C) --> Charge: 6.000000 x,y,z(Bohr): 12.110072 7.377238 0.055282

9(C) --> Charge: 6.000000 x,y,z(Bohr): 9.550466 6.954745 -0.340161

10(C) --> Charge: 6.000000 x,y,z(Bohr): 3.863363 5.029094 -1.056309

11(C) --> Charge: 6.000000 x,y,z(Bohr): 1.577038 3.789361 -1.322541

12(C) --> Charge: 6.000000 x,y,z(Bohr): 1.431468 1.143174 -1.101549

13(C) --> Charge: 6.000000 x,y,z(Bohr): 3.680995 -0.127820 -0.594361

14(C) --> Charge: 6.000000 x,y,z(Bohr): -5.507222 -2.839741 -1.975794

15(C) --> Charge: 6.000000 x,y,z(Bohr): -8.052859 -3.888117 -2.092719

16(N) --> Charge: 7.000000 x,y,z(Bohr): -9.732701 -2.291971 -0.983489

17(B) --> Charge: 5.000000 x,y,z(Bohr): -8.361041 0.273226 0.134046

18(C) --> Charge: 6.000000 x,y,z(Bohr): -5.525305 -0.498829 -0.709248  
19(C) --> Charge: 6.000000 x,y,z(Bohr): -3.237717 0.770656 -0.436861  
20(C) --> Charge: 6.000000 x,y,z(Bohr): -0.981180 -0.243484 -1.389688  
21(C) --> Charge: 6.000000 x,y,z(Bohr): -1.035008 -2.591318 -2.644614  
22(C) --> Charge: 6.000000 x,y,z(Bohr): -3.286714 -3.895940 -2.942291  
23(C) --> Charge: 6.000000 x,y,z(Bohr): -8.884206 -6.174870 -3.119608  
24(C) --> Charge: 6.000000 x,y,z(Bohr): -11.428844 -6.783068 -2.982819  
25(C) --> Charge: 6.000000 x,y,z(Bohr): -13.117130 -5.115573 -1.823414  
26(C) --> Charge: 6.000000 x,y,z(Bohr): -12.189632 -2.878374 -0.836377  
27(H) --> Charge: 1.000000 x,y,z(Bohr): 14.091436 1.329517 1.042625  
28(H) --> Charge: 1.000000 x,y,z(Bohr): 15.720800 5.694060 0.858593  
29(H) --> Charge: 1.000000 x,y,z(Bohr): 12.860417 9.281549 -0.027015  
30(H) --> Charge: 1.000000 x,y,z(Bohr): 8.296328 8.528391 -0.734771  
31(H) --> Charge: 1.000000 x,y,z(Bohr): 3.976953 7.062861 -1.236492  
32(H) --> Charge: 1.000000 x,y,z(Bohr): -0.118274 4.858605 -1.742112  
33(H) --> Charge: 1.000000 x,y,z(Bohr): 3.740379 -2.154313 -0.327737  
34(H) --> Charge: 1.000000 x,y,z(Bohr): -3.187347 2.558934 0.565014  
35(H) --> Charge: 1.000000 x,y,z(Bohr): 0.689776 -3.358865 -3.438001  
36(H) --> Charge: 1.000000 x,y,z(Bohr): -3.297061 -5.690216 -3.933711  
37(H) --> Charge: 1.000000 x,y,z(Bohr): -7.542001 -7.442876 -3.997816  
38(H) --> Charge: 1.000000 x,y,z(Bohr): -12.104584 -8.550346 -3.767063  
39(H) --> Charge: 1.000000 x,y,z(Bohr): -15.110846 -5.542965 -1.680818

40(H) --> Charge: 1.000000 x,y,z(Bohr): -13.383996 -1.508763 0.101400  
41(C) --> Charge: 6.000000 x,y,z(Bohr): 9.482549 -2.010912 -2.115483  
42(C) --> Charge: 6.000000 x,y,z(Bohr): 11.464492 -3.755425 -1.812157  
43(C) --> Charge: 6.000000 x,y,z(Bohr): 8.439854 -1.819311 -4.548142  
44(C) --> Charge: 6.000000 x,y,z(Bohr): 12.348246 -5.225239 -3.810034  
45(H) --> Charge: 1.000000 x,y,z(Bohr): 12.324738 -3.981625 0.035808  
46(C) --> Charge: 6.000000 x,y,z(Bohr): 9.299233 -3.291862 -6.559206  
47(H) --> Charge: 1.000000 x,y,z(Bohr): 6.927792 -0.480098 -4.911003  
48(C) --> Charge: 6.000000 x,y,z(Bohr): 11.262040 -5.005734 -6.199084  
49(H) --> Charge: 1.000000 x,y,z(Bohr): 13.882611 -6.550290 -3.498939  
50(H) --> Charge: 1.000000 x,y,z(Bohr): 8.440113 -3.089645 -8.410923  
51(H) --> Charge: 1.000000 x,y,z(Bohr): 11.938869 -6.152547 -7.757370  
52(C) --> Charge: 6.000000 x,y,z(Bohr): 8.408540 -1.672317 2.948222  
53(C) --> Charge: 6.000000 x,y,z(Bohr): 8.869803 -0.429122 5.248568  
54(C) --> Charge: 6.000000 x,y,z(Bohr): 7.602822 -4.199430 3.105908  
55(C) --> Charge: 6.000000 x,y,z(Bohr): 8.543990 -1.627737 7.571981  
56(H) --> Charge: 1.000000 x,y,z(Bohr): 9.510969 1.518712 5.227565  
57(C) --> Charge: 6.000000 x,y,z(Bohr): 7.259849 -5.414571 5.419121  
58(H) --> Charge: 1.000000 x,y,z(Bohr): 7.271518 -5.258265 1.379874  
59(C) --> Charge: 6.000000 x,y,z(Bohr): 7.730133 -4.129128 7.667511  
60(H) --> Charge: 1.000000 x,y,z(Bohr): 8.929025 -0.608197 9.309565  
61(H) --> Charge: 1.000000 x,y,z(Bohr): 6.639459 -7.369107 5.464912



62(H) --> Charge: 1.000000 x,y,z(Bohr): 7.476965 -5.069065 9.471664  
63(C) --> Charge: 6.000000 x,y,z(Bohr): -8.892921 0.335172 3.159935  
64(C) --> Charge: 6.000000 x,y,z(Bohr): -11.034095 1.540417 4.170943  
65(C) --> Charge: 6.000000 x,y,z(Bohr): -7.307385 -0.914636 4.884605  
66(C) --> Charge: 6.000000 x,y,z(Bohr): -11.572593 1.495031 6.750260  
67(H) --> Charge: 1.000000 x,y,z(Bohr): -12.290430 2.572621 2.920109  
68(C) --> Charge: 6.000000 x,y,z(Bohr): -7.821628 -0.964486 7.467851  
69(H) --> Charge: 1.000000 x,y,z(Bohr): -5.622218 -1.862313 4.200483  
70(C) --> Charge: 6.000000 x,y,z(Bohr): -9.963459 0.239480 8.412520  
71(H) --> Charge: 1.000000 x,y,z(Bohr): -13.239853 2.453376 7.463132  
72(H) --> Charge: 1.000000 x,y,z(Bohr): -6.545605 -1.938186 8.744189  
73(H) --> Charge: 1.000000 x,y,z(Bohr): -10.367201 0.210104 10.421941  
74(C) --> Charge: 6.000000 x,y,z(Bohr): -9.343958 2.733516 -1.424028  
75(C) --> Charge: 6.000000 x,y,z(Bohr): -10.472063 2.608627 -3.822061  
76(C) --> Charge: 6.000000 x,y,z(Bohr): -8.900161 5.165801 -0.447730  
77(C) --> Charge: 6.000000 x,y,z(Bohr): -11.139150 4.774821 -5.168113  
78(H) --> Charge: 1.000000 x,y,z(Bohr): -10.837530 0.784296 -4.688060  
79(C) --> Charge: 6.000000 x,y,z(Bohr): -9.545791 7.342288 -1.781641  
80(H) --> Charge: 1.000000 x,y,z(Bohr): -8.049978 5.361217 1.408475  
81(C) --> Charge: 6.000000 x,y,z(Bohr): -10.676760 7.157068 -4.152772  
82(H) --> Charge: 1.000000 x,y,z(Bohr): -12.015181 4.598716 -7.014188  
83(H) --> Charge: 1.000000 x,y,z(Bohr): -9.178266 9.186326 -0.962456

84(H) --> Charge: 1.000000 x,y,z(Bohr): -11.192459 8.846563 -5.192190

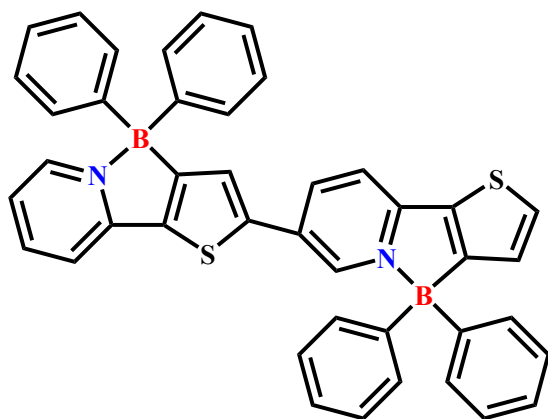

PBS2-DFT

1(C) --> Charge: 6.000000 x,y,z(Bohr): -3.339810 1.729526 0.397831

2(C) --> Charge: 6.000000 x,y,z(Bohr): -5.481976 0.237277 -0.187196

3(C) --> Charge: 6.000000 x,y,z(Bohr): -4.794495 -1.888191 -1.532996

4(S) --> Charge: 16.000000 x,y,z(Bohr): -1.570566 -2.105793 -2.120664

5(C) --> Charge: 6.000000 x,y,z(Bohr): -1.087812 0.745895 -0.479199

6(C) --> Charge: 6.000000 x,y,z(Bohr): -6.893253 -3.475119 -2.198618

7(N) --> Charge: 7.000000 x,y,z(Bohr): -9.067942 -2.388880 -1.325622

8(C) --> Charge: 6.000000 x,y,z(Bohr): -11.302744 -3.519040 -1.665105

9(C) --> Charge: 6.000000 x,y,z(Bohr): -11.504165 -5.801071 -2.929926

10(C) --> Charge: 6.000000 x,y,z(Bohr): -9.302856 -6.936119 -3.852004

11(C) --> Charge: 6.000000 x,y,z(Bohr): -6.981136 -5.780647 -3.489443

12(B) --> Charge: 5.000000 x,y,z(Bohr): -8.518117 0.311917 0.173283

13(C) --> Charge: 6.000000 x,y,z(Bohr): -9.531502 -0.034729 3.049145

14(C) --> Charge: 6.000000 x,y,z(Bohr): -9.753505 2.640591 -1.401386

15(C) --> Charge: 6.000000 x,y,z(Bohr): -8.009867 -1.109909 4.940606

16(C) --> Charge: 6.000000 x,y,z(Bohr): -8.905779 -1.518954 7.383533

17(C) --> Charge: 6.000000 x,y,z(Bohr): -11.377770 -0.865236 8.010825  
18(C) --> Charge: 6.000000 x,y,z(Bohr): -12.931345 0.206838 6.176296  
19(C) --> Charge: 6.000000 x,y,z(Bohr): -12.012258 0.615971 3.740471  
20(C) --> Charge: 6.000000 x,y,z(Bohr): -9.984780 5.019280 -0.238683  
21(C) --> Charge: 6.000000 x,y,z(Bohr): -10.887459 7.123342 -1.538395  
22(C) --> Charge: 6.000000 x,y,z(Bohr): -11.600949 6.914141 -4.064830  
23(C) --> Charge: 6.000000 x,y,z(Bohr): -11.387860 4.584208 -5.266810  
24(C) --> Charge: 6.000000 x,y,z(Bohr): -10.469905 2.492367 -3.950873  
25(C) --> Charge: 6.000000 x,y,z(Bohr): 13.019075 2.694177 0.788470  
26(C) --> Charge: 6.000000 x,y,z(Bohr): 10.410136 2.096977 0.552201  
27(C) --> Charge: 6.000000 x,y,z(Bohr): 8.958165 4.265254 0.560170  
28(S) --> Charge: 16.000000 x,y,z(Bohr): 10.712712 7.033071 0.856240  
29(C) --> Charge: 6.000000 x,y,z(Bohr): 13.465508 5.238041 0.972722  
30(C) --> Charge: 6.000000 x,y,z(Bohr): 6.302518 3.788348 0.308736  
31(N) --> Charge: 7.000000 x,y,z(Bohr): 5.920541 1.245655 0.082870  
32(C) --> Charge: 6.000000 x,y,z(Bohr): 3.600046 0.290573 -0.143941  
33(C) --> Charge: 6.000000 x,y,z(Bohr): 1.445873 1.813111 -0.213031  
34(C) --> Charge: 6.000000 x,y,z(Bohr): 1.827891 4.443372 0.000877  
35(C) --> Charge: 6.000000 x,y,z(Bohr): 4.228031 5.429615 0.274781  
36(B) --> Charge: 5.000000 x,y,z(Bohr): 8.623578 -0.358377 0.200195  
37(C) --> Charge: 6.000000 x,y,z(Bohr): 9.121921 -1.734706 -2.498231  
38(C) --> Charge: 6.000000 x,y,z(Bohr): 8.449203 -2.233651 2.624304

39(C) --> Charge: 6.000000 x,y,z(Bohr): 10.996248 -3.610956 -2.670867  
40(C) --> Charge: 6.000000 x,y,z(Bohr): 11.612828 -4.758181 -4.958609  
41(C) --> Charge: 6.000000 x,y,z(Bohr): 10.357616 -4.066402 -7.168196  
42(C) --> Charge: 6.000000 x,y,z(Bohr): 8.496582 -2.210963 -7.056331  
43(C) --> Charge: 6.000000 x,y,z(Bohr): 7.903721 -1.064753 -4.757297  
44(C) --> Charge: 6.000000 x,y,z(Bohr): 7.464101 -4.691742 2.413346  
45(C) --> Charge: 6.000000 x,y,z(Bohr): 7.200513 -6.270602 4.506693  
46(C) --> Charge: 6.000000 x,y,z(Bohr): 7.933952 -5.433668 6.892213  
47(C) --> Charge: 6.000000 x,y,z(Bohr): 8.928538 -3.010705 7.157343  
48(C) --> Charge: 6.000000 x,y,z(Bohr): 9.172839 -1.444322 5.053588  
49(H) --> Charge: 1.000000 x,y,z(Bohr): -3.420094 3.462148 1.482553  
50(H) --> Charge: 1.000000 x,y,z(Bohr): -12.925063 -2.544482 -0.889054  
51(H) --> Charge: 1.000000 x,y,z(Bohr): -13.337252 -6.669293 -3.179504  
52(H) --> Charge: 1.000000 x,y,z(Bohr): -9.409257 -8.724326 -4.844973  
53(H) --> Charge: 1.000000 x,y,z(Bohr): -5.251048 -6.629645 -4.174304  
54(H) --> Charge: 1.000000 x,y,z(Bohr): -6.076374 -1.634009 4.499590  
55(H) --> Charge: 1.000000 x,y,z(Bohr): -7.672535 -2.344167 8.799040  
56(H) --> Charge: 1.000000 x,y,z(Bohr): -12.081220 -1.176865 9.910753  
57(H) --> Charge: 1.000000 x,y,z(Bohr): -14.855825 0.738912 6.644812  
58(H) --> Charge: 1.000000 x,y,z(Bohr): -13.242228 1.499014 2.356633  
59(H) --> Charge: 1.000000 x,y,z(Bohr): -9.465210 5.225390 1.734895  
60(H) --> Charge: 1.000000 x,y,z(Bohr): -11.043900 8.926782 -0.574367

61(H) --> Charge: 1.000000 x,y,z(Bohr): -12.313968 8.545046 -5.080891  
62(H) --> Charge: 1.000000 x,y,z(Bohr): -11.931361 4.391618 -7.234988  
63(H) --> Charge: 1.000000 x,y,z(Bohr): -10.307006 0.712989 -4.959384  
64(H) --> Charge: 1.000000 x,y,z(Bohr): 14.525294 1.311021 0.818464  
65(H) --> Charge: 1.000000 x,y,z(Bohr): 15.257337 6.195770 1.168366  
66(H) --> Charge: 1.000000 x,y,z(Bohr): 3.486242 -1.750120 -0.242297  
67(H) --> Charge: 1.000000 x,y,z(Bohr): 0.216531 5.702963 -0.084402  
68(H) --> Charge: 1.000000 x,y,z(Bohr): 4.524462 7.446872 0.436742  
69(H) --> Charge: 1.000000 x,y,z(Bohr): 11.983550 -4.199050 -0.972036  
70(H) --> Charge: 1.000000 x,y,z(Bohr): 13.069774 -6.200545 -5.015144  
71(H) --> Charge: 1.000000 x,y,z(Bohr): 10.825940 -4.960961 -8.951920  
72(H) --> Charge: 1.000000 x,y,z(Bohr): 7.506542 -1.645864 -8.761326  
73(H) --> Charge: 1.000000 x,y,z(Bohr): 6.461329 0.394138 -4.751059  
74(H) --> Charge: 1.000000 x,y,z(Bohr): 6.928716 -5.405001 0.565756  
75(H) --> Charge: 1.000000 x,y,z(Bohr): 6.436922 -8.159684 4.272455  
76(H) --> Charge: 1.000000 x,y,z(Bohr): 7.743265 -6.659818 8.523872  
77(H) --> Charge: 1.000000 x,y,z(Bohr): 9.518008 -2.340893 9.003969  
78(H) --> Charge: 1.000000 x,y,z(Bohr): 9.954144 0.435059 5.307290
